# Supplementary material
Source: HighWire-hosted journal article supplement (https://bmjleader.bmj.com/highwire/filestream/2089/field_highwire_adjunct_files/2/leader-2021-000518supp003_data_supplement.pdf)
Supplement: leader-2021-000518supp003_data_supplement.pdf [file leader-2021-000518supp003_data_supplement.pdf]

| <b>Demographics or other characteristics of respondents</b>                                                                                                                                                                       | <b>Percentage of respondents (and number of respondents in brackets) unless otherwise specified</b> |
|-----------------------------------------------------------------------------------------------------------------------------------------------------------------------------------------------------------------------------------|-----------------------------------------------------------------------------------------------------|
| <b>Age:</b> n=561 median age group (range)                                                                                                                                                                                        | Median 45-49 years (mode 50-54 years, range from "24 or under" to "70 or older")                    |
| <b>Gender:</b> n=561                                                                                                                                                                                                              |                                                                                                     |
| Female                                                                                                                                                                                                                            | 79.32% (445)                                                                                        |
| Male                                                                                                                                                                                                                              | 18.00% (101)                                                                                        |
| Prefer not to say                                                                                                                                                                                                                 | 2.67% (15)                                                                                          |
| Prefer to self describe                                                                                                                                                                                                           | 0                                                                                                   |
| <b>Ethnicity:</b> n=563                                                                                                                                                                                                           |                                                                                                     |
| White                                                                                                                                                                                                                             | 95.20% (536)                                                                                        |
| Don't know or prefer not to say                                                                                                                                                                                                   | 2.49% (14)                                                                                          |
| Other ethnic groups (including Mixed, Black, Asian or Other)                                                                                                                                                                      | 2.30% (13)                                                                                          |
| <b>Main area of work:</b> n=562                                                                                                                                                                                                   |                                                                                                     |
| County Durham                                                                                                                                                                                                                     | 77.22% (434)                                                                                        |
| Darlington                                                                                                                                                                                                                        | 14.06% (79)                                                                                         |
| Across County Durham and Darlington equally                                                                                                                                                                                       | 6.58% (37)                                                                                          |
| Other area in North East                                                                                                                                                                                                          | 2.14% (12)                                                                                          |
| <b>Do you have any physical or mental health conditions, illnesses, or disabilities lasting or expected to last 12 months or more?:</b> n=565                                                                                     |                                                                                                     |
| Yes                                                                                                                                                                                                                               | 33.10% (187)                                                                                        |
| No                                                                                                                                                                                                                                | 60.00% (339)                                                                                        |
| Don't know or prefer not to say                                                                                                                                                                                                   | 6.90% (39)                                                                                          |
| <b>Sector of work:</b> n=564                                                                                                                                                                                                      |                                                                                                     |
| The NHS or health sector                                                                                                                                                                                                          | 54.08% (305)                                                                                        |
| Social Care (including care home staff and domiciliary care)                                                                                                                                                                      | 16.84% (95)                                                                                         |
| Local/national government                                                                                                                                                                                                         | 14.72% (83)                                                                                         |
| Education and Childcare                                                                                                                                                                                                           | 8.87% (50)                                                                                          |
| Key public services (e.g. justice system, religious staff, frontline charities, staff caring for the deceased, journalists and broadcasters)                                                                                      | 3.19% (18)                                                                                          |
| Other sectors including: Food or other essential goods production/ processing/ distribution/ sale/ delivery, Public safety (e.g. police, fire, prison staff), Transport, Utilities, communication, or financial services or other | 2.30% (13)                                                                                          |
